# Supplementary material for: Complete Response To Tislelizumab In A Muscle-Invasive Urothelial Carcinoma After Surgery Associated With Tumor Mutational Burden High: A Case Report
Source: Research Square preprint supplement (doi:10.21203/rs.3.rs-1226643/v1), 2022-01-14
Supplement: Supplementary file 1 [file c81b37ef72537ad5d1de6fa0.docx]

| Supplementary Table S2. Germline mutations of the patient. | | | | | | |
| --- | --- | --- | --- | --- | --- | --- |
| Gene name | Transcript | Base change | Amino acid change | Mutation position | Genotype | Pathogenicity |
| ALK | NM_004304.4 | c.3035C>T | p.T1012M | exon18 | Heterozygous | Benign |
| BRCA2 | NM_000059.3 | c.1744A>C | p.T582P | exon10 | Heterozygous | Benign |
| BRIP1 | NM_032043.2 | c.587A>G | p.N196S | exon6 | Heterozygous | Benign |
| FANCA | NM_000135.2 | c.2981+4dupA |  | intron30 | Heterozygous | Variant of uncertain significance |
| FANCC | NM_000136.2 | c.973G>A | p.A325T | exon10 | Heterozygous | Benign |
| MSH3 | NM_002439.4 | c.356C>T | p.S119F | exon2 | Heterozygous | Benign |
